# Supplementary material for: Ion Channel and Ubiquitin Differential Expression during Erythromycin-Induced Anhidrosis in Foals
Source: MDPI journal article supplement (doi:10.3390/ani11123379), 2021-11-25

Supplemental Figure 1. Three dimensional scatterplot of principal components 1, 2 and 3.

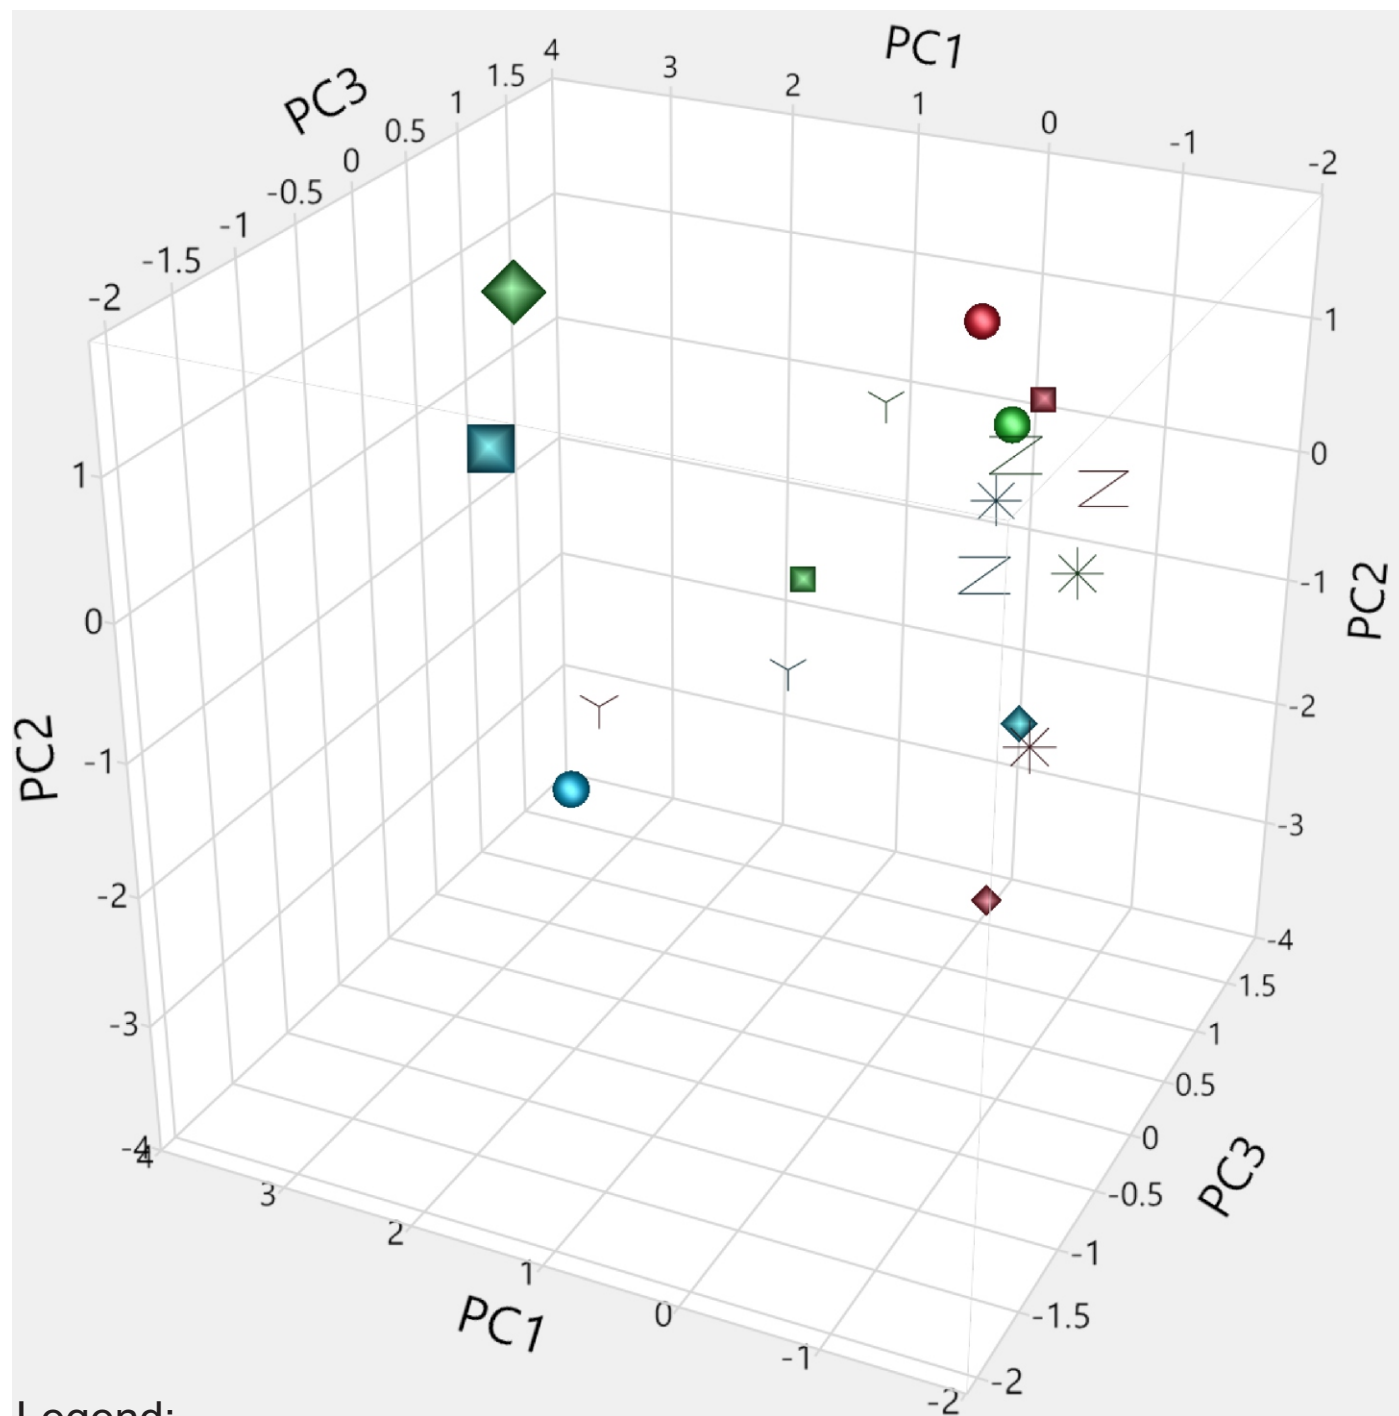

Legend:

Horse

- H2
- Y H4
- \* H6
- ◇ H8
- H10
- Z H12

Day

- D-1
- D9
- D39

Supplemental Figure 2. ANOVA analyses of the principal components 1 (a, b), 2 (c, d), and 3 (e, f) versus horse (a, c, e) or day (b, d, f) show no significant effect of individual horse or day ( $p > 0.05$ ). Respective significance values are noted in each plot.

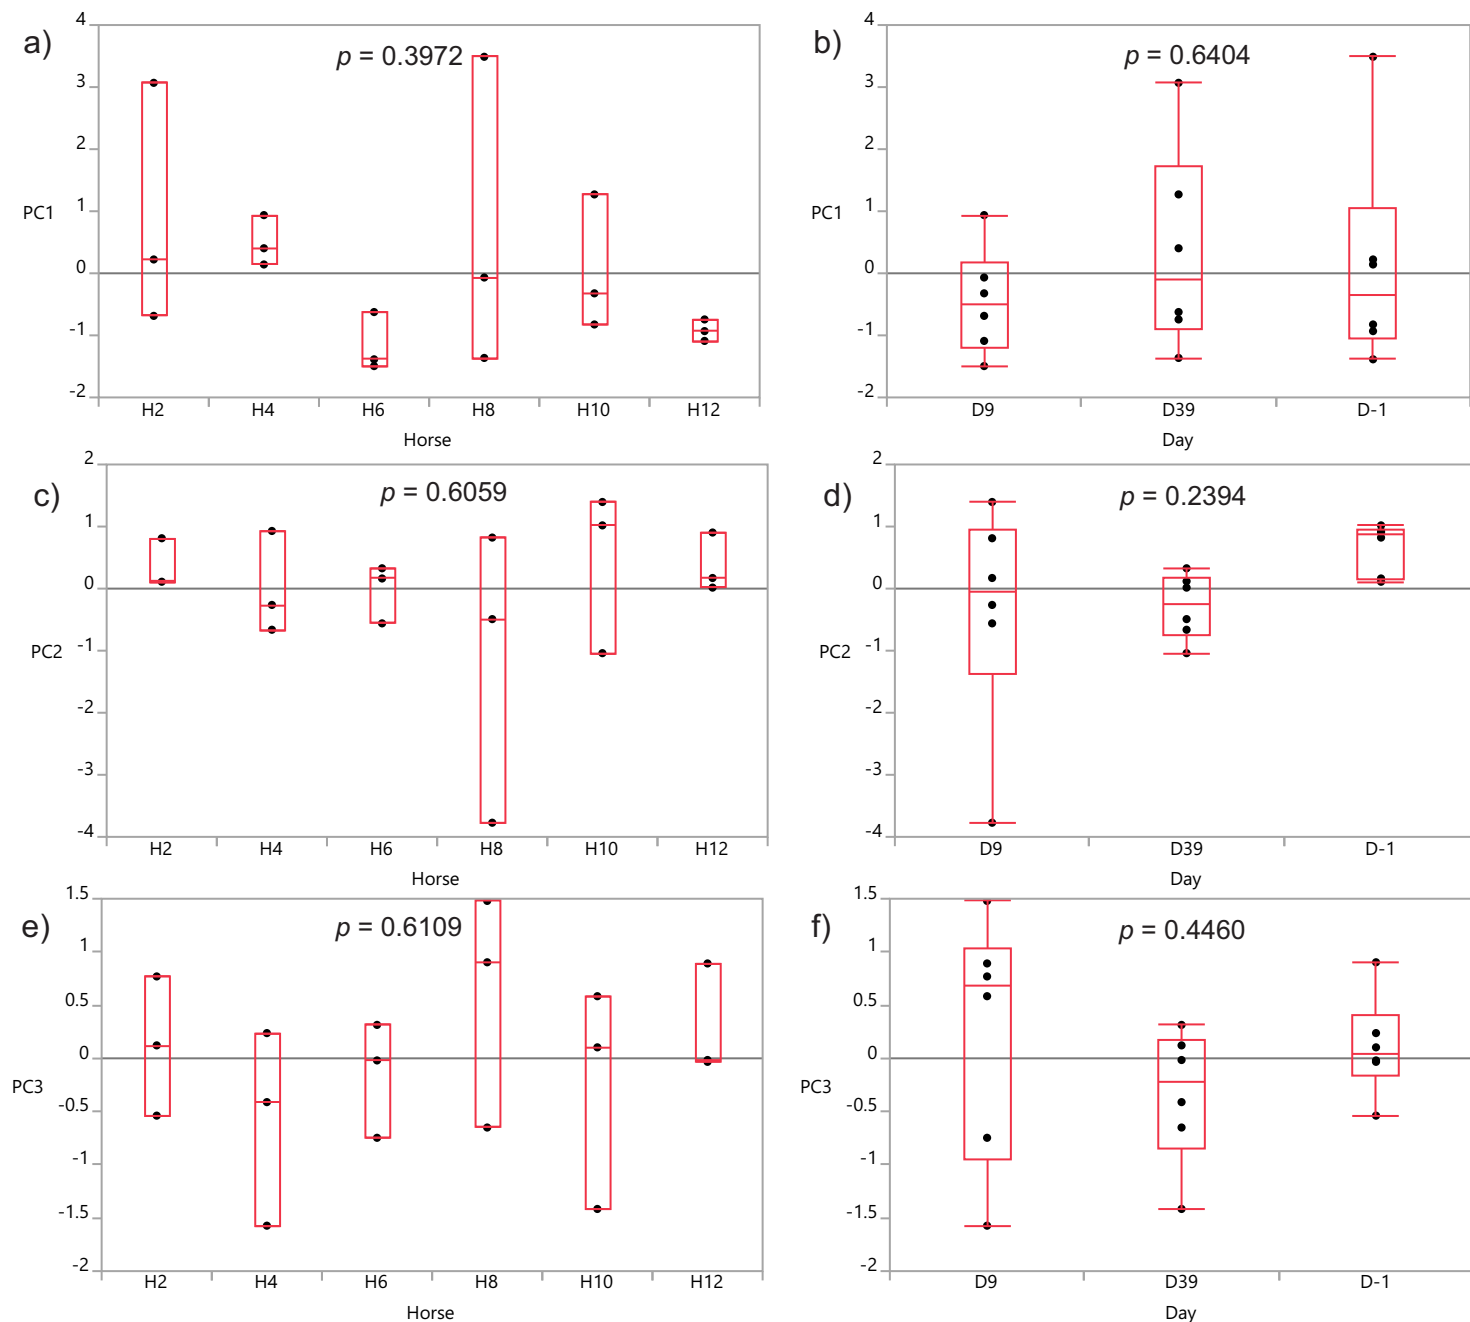

Supplement: s1 [file s1]
